# Supplementary material
Source: PubMed Central journal article supplement (PMC7855657)
Supplement: NIHMS1620828-supplement-supp_figS1.pdf [file NIHMS1620828-supplement-supp_figS1.pdf]

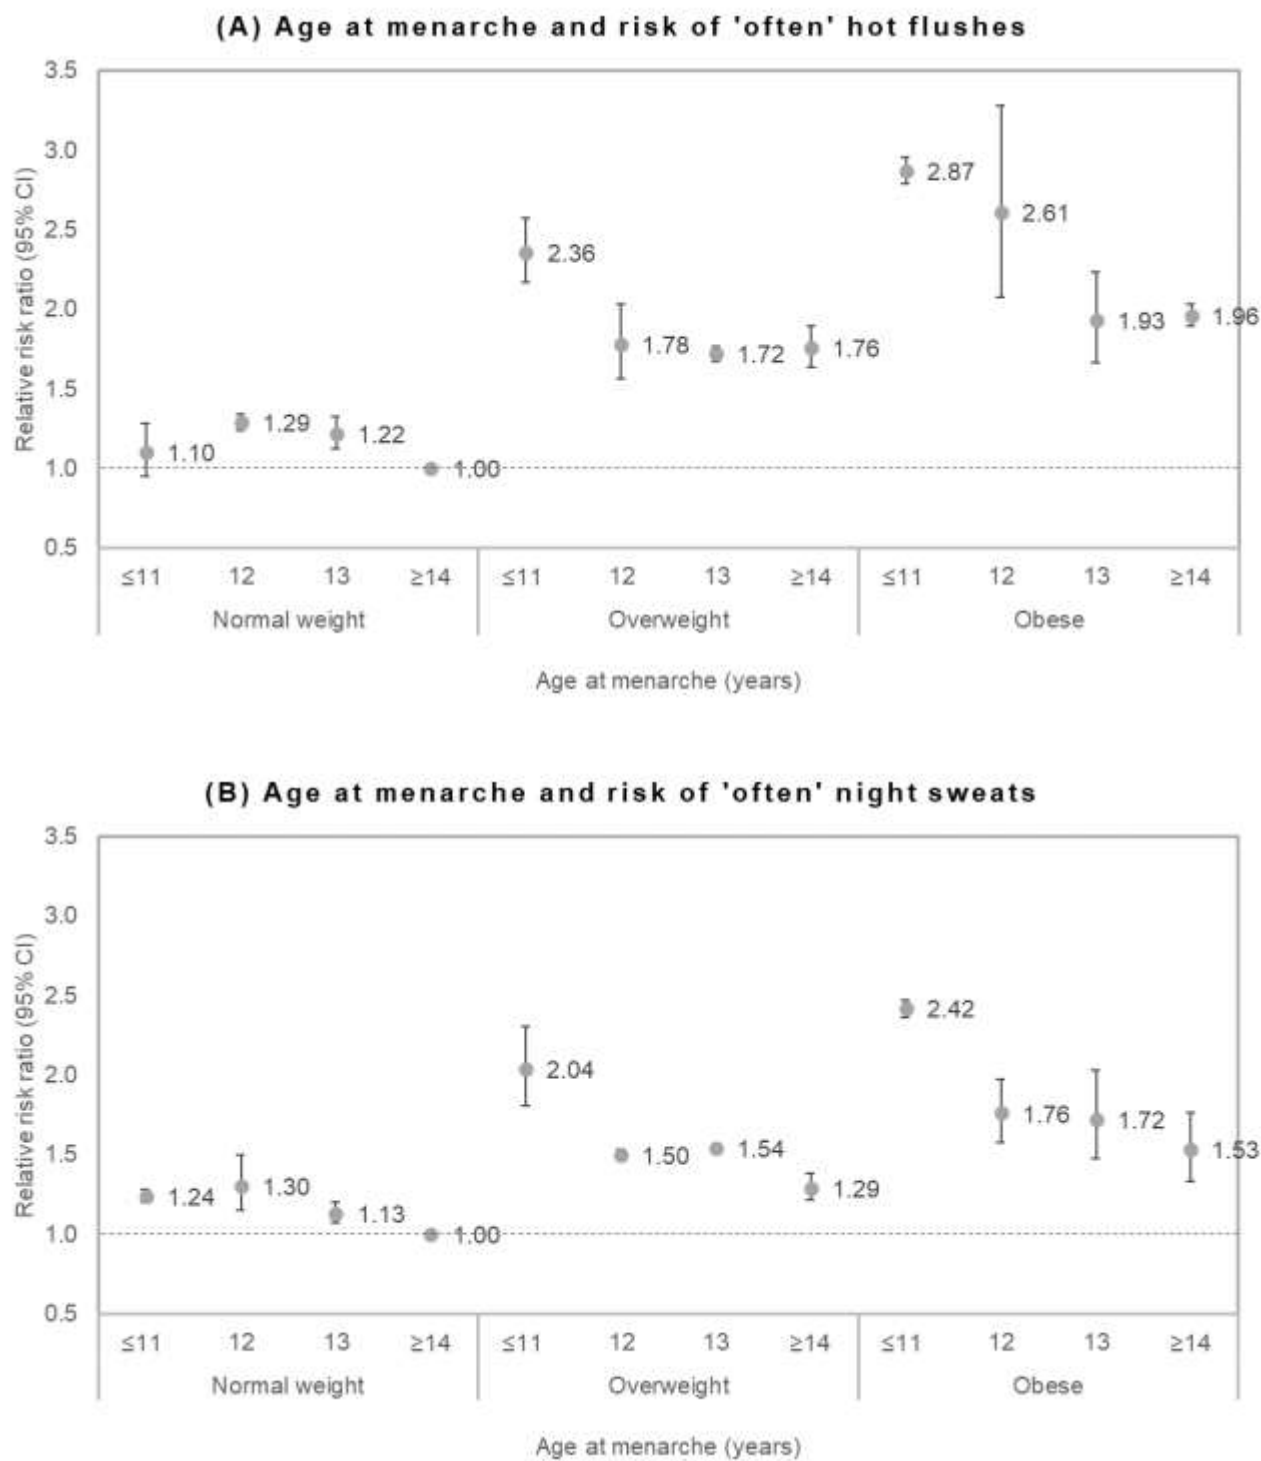

**Figure S1.** Joint association between age at menarche and midlife BMI with risk of (A) 'often' hot flushes and (B) 'often' night sweats (normal weight: BMI <25 kg/m<sup>2</sup>; overweight: BMI 25-29.9 kg/m<sup>2</sup>; obese: BMI ≥30 kg/m<sup>2</sup>). The effect estimates were adjusted for birth year and race/ethnicity/region.
