# Supplementary material
Source: PubMed Central journal article supplement (PMC7855657)
Supplement: NIHMS1620828-supplement-supp_tableS1-7.pdf [file NIHMS1620828-supplement-supp_tableS1-7.pdf]

**Table S1.** Participant characteristics according to the frequency/severity of hot flushes (N=18,555)

|                                         | N            | Frequency or severity of hot flushes |                      |                             |                       | p-value |
|-----------------------------------------|--------------|--------------------------------------|----------------------|-----------------------------|-----------------------|---------|
|                                         |              | Never<br>n (%)                       | Rarely/Mild<br>n (%) | Sometimes/Moderate<br>n (%) | Often/Severe<br>n (%) |         |
| Birth year                              |              |                                      |                      |                             |                       | <0.0001 |
| 1940-1949                               | 10585 (57.0) | 5569 (52.6)                          | 1751 (16.5)          | 2204 (20.8)                 | 1061 (10.0)           |         |
| 1950-1959                               | 7970 (43.0)  | 4306 (54.0)                          | 1025 (12.9)          | 1763 (22.1)                 | 876 (11.0)            |         |
| Race/ethnicity/region                   |              |                                      |                      |                             |                       | <0.0001 |
| Caucasian- Australian                   | 8762 (47.2)  | 4550 (51.9)                          | 1447 (16.5)          | 1892 (21.6)                 | 873 (10.0)            |         |
| Caucasian- European                     | 6059 (32.7)  | 2704 (44.6)                          | 626 (10.3)           | 1852 (30.6)                 | 877 (14.5)            |         |
| Caucasian- American                     | 1694 (9.1)   | 1256 (74.1)                          | 304 (18.0)           | 68 (4.0)                    | 66 (3.9)              |         |
| Asian                                   | 787 (4.2)    | 560 (71.2)                           | 127 (16.1)           | 70 (8.9)                    | 30 (3.8)              |         |
| African American/Black                  | 861 (4.6)    | 560 (65.0)                           | 194 (22.5)           | 48 (5.6)                    | 59 (6.9)              |         |
| Other                                   | 392 (2.1)    | 245 (62.5)                           | 78 (19.9)            | 37 (9.4)                    | 32 (8.2)              |         |
| Education level                         |              |                                      |                      |                             |                       | <0.0001 |
| ≤10 years                               | 8213 (44.3)  | 3683 (44.8)                          | 1122 (13.7)          | 2263 (27.6)                 | 1145 (13.9)           |         |
| 11-12 years                             | 3011 (16.2)  | 1659 (55.1)                          | 502 (16.7)           | 600 (19.9)                  | 250 (8.3)             |         |
| >12 years                               | 7331 (39.5)  | 4533 (61.8)                          | 1152 (15.7)          | 1104 (15.1)                 | 542 (7.4)             |         |
| Smoking status                          |              |                                      |                      |                             |                       | <0.0001 |
| Never smoker                            | 9809 (52.9)  | 5606 (57.2)                          | 1435 (19.7)          | 1931 (19.7)                 | 837 (8.5)             |         |
| Past smoker                             | 5410 (29.2)  | 2815 (52.0)                          | 844 (22.0)           | 1189 (22.0)                 | 562 (10.4)            |         |
| Current smoker                          | 3336 (18.0)  | 1454 (43.6)                          | 497 (25.4)           | 847 (25.4)                  | 538 (16.1)            |         |
| Body mass index                         |              |                                      |                      |                             |                       | <0.0001 |
| Normal weight (<25 kg/m <sup>2</sup> )  | 9174 (49.4)  | 5282 (57.6)                          | 1292 (14.1)          | 1802 (19.6)                 | 798 (8.7)             |         |
| Overweight (25-29.9 kg/m <sup>2</sup> ) | 5411 (29.2)  | 2705 (50.0)                          | 815 (15.1)           | 1248 (23.1)                 | 643 (11.9)            |         |
| Obese (≥30 kg/m <sup>2</sup> )          | 3970 (21.4)  | 1888 (47.6)                          | 669 (16.9)           | 917 (23.1)                  | 496 (12.5)            |         |
| Menopausal status                       |              |                                      |                      |                             |                       | <0.0001 |
| Unknown due to surgery                  | 3221 (17.4)  | 1314 (40.8)                          | 488 (15.2)           | 886 (27.5)                  | 533 (16.6)            |         |
| Unknown due to hormone use              | 2233 (12.0)  | 1003 (44.9)                          | 337 (15.1)           | 602 (27.0)                  | 291 (13.0)            |         |
| Premenopause                            | 6400 (34.5)  | 4661 (72.8)                          | 844 (13.2)           | 747 (11.7)                  | 148 (2.3)             |         |
| Perimenopause                           | 5177 (27.9)  | 2433 (47.0)                          | 902 (17.4)           | 1224 (23.6)                 | 618 (11.9)            |         |
| Postmenopause                           | 1524 (8.2)   | 464 (30.5)                           | 205 (13.5)           | 508 (33.3)                  | 347 (22.8)            |         |
| Menopausal hormone therapy              |              |                                      |                      |                             |                       | <0.0001 |
| Current                                 | 2609 (14.1)  | 925 (35.5)                           | 424 (16.3)           | 778 (29.8)                  | 482 (18.5)            |         |
| Non-current                             | 15946 (85.9) | 8950 (56.1)                          | 2352 (14.8)          | 3189 (20.0)                 | 1455 (9.1)            |         |
| Type 2 diabetes status                  |              |                                      |                      |                             |                       | 0.0026  |
| Yes                                     | 588 (3.2)    | 298 (50.7)                           | 98 (16.7)            | 107 (18.2)                  | 85 (14.5)             |         |
| No                                      | 17945 (96.8) | 9567 (53.3)                          | 2675 (14.9)          | 3856 (21.5)                 | 1847 (10.3)           |         |

**Table S2.** Study-specific association between age at menarche and risk of hot flushes and night sweats

| Age at menarche     | n     | Hot flushes<br>n (%)  |                 |                        |                  | Hot flushes<br>Model 1: RRR (95% CI) <sup>a</sup>  |                        |                  | Hot flushes<br>Model 2: RRR (95% CI) <sup>b</sup>  |                        |                  |
|---------------------|-------|-----------------------|-----------------|------------------------|------------------|----------------------------------------------------|------------------------|------------------|----------------------------------------------------|------------------------|------------------|
|                     |       | Never                 | Rarely<br>/Mild | Sometimes<br>/Moderate | Often<br>/Severe | Rarely<br>/Mild                                    | Sometimes<br>/Moderate | Often<br>/Severe | Rarely<br>/Mild                                    | Sometimes<br>/Moderate | Often<br>/Severe |
| <b>Frequency</b>    |       |                       |                 |                        |                  |                                                    |                        |                  |                                                    |                        |                  |
| <b>ALSWH</b>        | 10523 | 5436 (51.7)           | 1687 (16.0)     | 2334 (22.2)            | 1066 (10.1)      |                                                    |                        |                  |                                                    |                        |                  |
| ≤11 years           | 1976  | 938 (47.5)            | 342 (17.3)      | 459 (23.2)             | 237 (12.0)       | 1.20 (1.02-1.40)                                   | 1.14 (0.99-1.31)       | 1.50 (1.24-1.82) | 1.11 (0.95-1.31)                                   | 1.01 (0.87-1.16)       | 1.32 (1.08-1.60) |
| 12 years            | 2274  | 1196 (52.6)           | 355 (15.6)      | 475 (20.9)             | 248 (10.9)       | 0.97 (0.84-1.14)                                   | 0.93 (0.81-1.07)       | 1.25 (1.04-1.50) | 0.94 (0.81-1.10)                                   | 0.88 (0.76-1.01)       | 1.17 (0.97-1.41) |
| 13 years            | 2944  | 1554 (52.8)           | 457 (15.5)      | 646 (21.9)             | 287 (9.8)        | 0.97 (0.84-1.12)                                   | 0.97 (0.86-1.10)       | 1.11 (0.93-1.33) | 0.95 (0.83-1.10)                                   | 0.95 (0.83-1.07)       | 1.08 (0.90-1.29) |
| ≥14 years           | 3329  | 1748 (52.5)           | 533 (16.0)      | 754 (22.7)             | 294 (8.8)        | Ref                                                | Ref                    | Ref              | Ref                                                | Ref                    | Ref              |
| Per 1-year decrease |       |                       |                 |                        |                  | 1.03 (0.99-1.06)                                   | 1.02 (0.99-1.05)       | 1.10 (1.05-1.15) | 1.01 (0.98-1.05)                                   | 1.00 (0.96-1.03)       | 1.07 (1.02-1.12) |
| <b>SWAN</b>         | 3079  | 2257 (73.3)           | 586 (19.0)      | 99 (3.2)               | 137 (4.4)        |                                                    |                        |                  |                                                    |                        |                  |
| ≤11 years           | 737   | 517 (70.2)            | 155 (21.0)      | 30 (4.1)               | 35 (4.8)         | 1.25 (0.96-1.63)                                   | 1.87 (1.00-3.48)       | 1.31 (0.78-2.19) | 1.16 (0.89-1.52)                                   | 1.64 (0.87-3.08)       | 1.15 (0.68-1.94) |
| 12 years            | 810   | 599 (74.0)            | 142 (17.5)      | 28 (3.5)               | 41 (5.1)         | 1.02 (0.78-1.34)                                   | 1.57 (0.84-2.94)       | 1.40 (0.85-2.30) | 0.99 (0.76-1.30)                                   | 1.47 (0.78-2.77)       | 1.31 (0.79-2.17) |
| 13 years            | 832   | 612 (73.6)            | 162 (19.5)      | 25 (3.0)               | 33 (4.0)         | 1.16 (0.89-1.50)                                   | 1.38 (0.72-2.62)       | 1.11 (0.66-1.88) | 1.13 (0.87-1.47)                                   | 1.31 (0.69-2.50)       | 1.06 (0.63-1.79) |
| ≥14 years           | 700   | 529 (75.6)            | 127 (18.1)      | 16 (2.3)               | 28 (4.0)         | Ref                                                | Ref                    | Ref              | Ref                                                | Ref                    | Ref              |
| Per 1-year decrease |       |                       |                 |                        |                  | 1.05 (0.99-1.11)                                   | 1.15 (1.01-1.30)       | 1.09 (0.98-1.21) | 1.03 (0.98-1.09)                                   | 1.12 (0.98-1.27)       | 1.06 (0.96-1.18) |
| <b>Severity</b>     |       |                       |                 |                        |                  |                                                    |                        |                  |                                                    |                        |                  |
| <b>NSHD</b>         | 1041  | 649 (62.3)            | 63 (6.1)        | 266 (25.6)             | 63 (6.1)         |                                                    |                        |                  |                                                    |                        |                  |
| ≤11 years           | 177   | 93 (52.5)             | 13 (7.3)        | 60 (33.9)              | 11 (6.2)         | 2.16 (0.89-5.26)                                   | 1.66 (1.06-2.61)       | 2.06 (0.80-5.30) | 2.29 (0.93-5.66)                                   | 1.56 (0.99-2.48)       | 1.98 (0.76-5.16) |
| 12 years            | 296   | 192 (64.9)            | 14 (4.7)        | 69 (23.3)              | 21 (7.1)         | 1.13 (0.47-2.68)                                   | 0.93 (0.61-1.41)       | 1.90 (0.82-4.42) | 1.17 (0.49-2.78)                                   | 0.89 (0.59-1.36)       | 1.85 (0.79-4.33) |
| 13 years            | 358   | 225 (62.9)            | 27 (7.5)        | 83 (23.2)              | 23 (6.4)         | 1.85 (0.85-4.06)                                   | 0.95 (0.64-1.42)       | 1.78 (0.77-4.08) | 1.88 (0.86-4.13)                                   | 0.92 (0.62-1.38)       | 1.74 (0.75-4.00) |
| ≥14 years           | 210   | 139 (66.2)            | 9 (4.3)         | 54 (25.7)              | 8 (3.8)          | Ref                                                | Ref                    | Ref              | Ref                                                | Ref                    | Ref              |
| Per 1-year decrease |       |                       |                 |                        |                  | 1.07 (0.86-1.33)                                   | 1.14 (1.01-1.29)       | 1.16 (0.93-1.46) | 1.09 (0.87-1.36)                                   | 1.12 (0.99-1.27)       | 1.15 (0.91-1.45) |
| <b>NCDS</b>         | 3261  | 1139 (34.9)           | 278 (8.5)       | 1202 (36.9)            | 642 (19.7)       |                                                    |                        |                  |                                                    |                        |                  |
| ≤11 years           | 532   | 185 (34.6)            | 55 (10.3)       | 195 (36.7)             | 98 (18.4)        | 1.28 (0.86-1.89)                                   | 1.08 (0.83-1.39)       | 1.06 (0.78-1.45) | 1.24 (0.83-1.85)                                   | 1.04 (0.80-1.34)       | 0.98 (0.71-1.34) |
| 12 years            | 808   | 276 (34.2)            | 67 (8.3)        | 297 (36.8)             | 168 (20.8)       | 1.03 (0.71-1.49)                                   | 1.09 (0.87-1.36)       | 1.22 (0.93-1.60) | 1.01 (0.69-1.46)                                   | 1.06 (0.85-1.34)       | 1.16 (0.88-1.53) |
| 13 years            | 1080  | 371 (34.4)            | 83 (7.7)        | 404 (37.4)             | 222 (20.6)       | 0.95 (0.67-1.35)                                   | 1.10 (0.89-1.36)       | 1.19 (0.92-1.54) | 0.94 (0.66-1.33)                                   | 1.08 (0.88-1.34)       | 1.16 (0.90-1.50) |
| ≥14 years           | 841   | 308 (36.6)            | 73 (8.7)        | 306 (36.4)             | 154 (18.3)       | Ref                                                | Ref                    | Ref              | Ref                                                | Ref                    | Ref              |
| Per 1-year decrease |       |                       |                 |                        |                  | 1.06 (0.95-1.18)                                   | 1.02 (0.95-1.09)       | 1.04 (0.96-1.13) | 1.05 (0.94-1.17)                                   | 1.01 (0.94-1.08)       | 1.02 (0.94-1.11) |
| <b>HOW</b>          | 462   | 266 (57.6)            | 130 (28.1)      | 49 (10.6)              | 17 (3.7)         |                                                    |                        |                  |                                                    |                        |                  |
| ≤11 years           | 91    | 57 (62.6)             | 17 (18.7)       | 12 (13.2)              | 5 (5.5)          | N/A                                                | N/A                    | N/A              | N/A                                                | N/A                    | N/A              |
| 12 years            | 74    | 34 (46.0)             | 34 (46.0)       | 5 (6.8)                | 1 (1.4)          |                                                    |                        |                  |                                                    |                        |                  |
| 13 years            | 128   | 74 (57.8)             | 38 (29.7)       | 12 (9.4)               | 4 (3.1)          |                                                    |                        |                  |                                                    |                        |                  |
| ≥14 years           | 169   | 101 (59.8)            | 41 (24.3)       | 20 (11.8)              | 7 (4.1)          |                                                    |                        |                  |                                                    |                        |                  |
| Per 1-year decrease |       |                       |                 |                        |                  |                                                    |                        |                  |                                                    |                        |                  |
| <b>SMWHS</b>        | 189   | 128 (67.7)            | 32 (16.9)       | 17 (9.0)               | 12 (6.3)         |                                                    |                        |                  |                                                    |                        |                  |
| ≤11 years           | 32    | 21 (65.6)             | 5 (15.6)        | 3 (9.4)                | 3 (9.4)          | N/A                                                | N/A                    | N/A              | N/A                                                | N/A                    | N/A              |
| 12 years            | 60    | 40 (66.7)             | 9 (15.0)        | 5 (8.3)                | 6 (10.0)         |                                                    |                        |                  |                                                    |                        |                  |
| 13 years            | 60    | 45 (75.0)             | 8 (13.3)        | 6 (10.0)               | 1 (1.7)          |                                                    |                        |                  |                                                    |                        |                  |
| ≥14 years           | 37    | 22 (59.5)             | 10 (27.0)       | 3 (8.1)                | 2 (5.4)          |                                                    |                        |                  |                                                    |                        |                  |
| Per 1-year decrease |       |                       |                 |                        |                  |                                                    |                        |                  |                                                    |                        |                  |
| <b>Night sweats</b> |       |                       |                 |                        |                  |                                                    |                        |                  |                                                    |                        |                  |
| Age at menarche     | n     | Night sweats<br>n (%) |                 |                        |                  | Night sweats<br>Model 1: RRR (95% CI) <sup>a</sup> |                        |                  | Night sweats<br>Model 2: RRR (95% CI) <sup>b</sup> |                        |                  |
|                     |       | Never                 | Rarely<br>/Mild | Sometimes<br>/Moderate | Often<br>/Severe | Rarely<br>/Mild                                    | Sometimes<br>/Moderate | Often<br>/Severe | Rarely<br>/Mild                                    | Sometimes<br>/Moderate | Often<br>/Severe |

| <b>Frequency</b>    |       |             |             |             |            |                  |                  |                  |                  |                  |                  |
|---------------------|-------|-------------|-------------|-------------|------------|------------------|------------------|------------------|------------------|------------------|------------------|
| <b>ALSWH</b>        | 10523 | 6451 (61.3) | 1523 (14.5) | 1746 (16.6) | 803 (7.6)  |                  |                  |                  |                  |                  |                  |
| ≤11 years           | 1976  | 1135 (57.4) | 300 (15.2)  | 349 (17.7)  | 192 (9.7)  | 1.16 (0.99-1.36) | 1.13 (0.97-1.31) | 1.64 (1.33-2.01) | 1.13 (0.96-1.34) | 1.05 (0.90-1.22) | 1.49 (1.21-1.84) |
| 12 years            | 2274  | 1406 (61.8) | 309 (13.6)  | 383 (16.8)  | 176 (7.7)  | 0.97 (0.83-1.14) | 1.01 (0.87-1.17) | 1.23 (1.00-1.52) | 0.96 (0.82-1.13) | 0.98 (0.84-1.13) | 1.18 (0.95-1.46) |
| 13 years            | 2944  | 1834 (62.3) | 411 (15.0)  | 448 (15.2)  | 221 (7.5)  | 1.06 (0.92-1.23) | 0.90 (0.79-1.04) | 1.18 (0.97-1.44) | 1.06 (0.91-1.22) | 0.89 (0.77-1.02) | 1.15 (0.95-1.41) |
| ≥14 years           | 3329  | 2076 (62.4) | 473 (14.2)  | 566 (17.0)  | 214 (6.4)  | Ref              | Ref              | Ref              | Ref              | Ref              | Ref              |
| Per 1-year decrease |       |             |             |             |            | 1.03 (0.99-1.07) | 1.02 (0.99-1.05) | 1.12 (1.07-1.18) | 1.02 (0.99-1.06) | 1.00 (0.97-1.04) | 1.10 (1.04-1.15) |
| <b>SWAN</b>         | 3079  | 2173 (70.6) | 708 (23.0)  | 84 (2.7)    | 114 (3.7)  |                  |                  |                  |                  |                  |                  |
| ≤11 years           | 737   | 524 (71.1)  | 162 (22.0)  | 18 (2.4)    | 33 (4.5)   | 0.86 (0.67-1.10) | 1.35 (0.64-2.83) | 1.42 (0.81-2.50) | 0.84 (0.65-1.08) | 1.26 (0.59-2.66) | 1.33 (0.75-2.37) |
| 12 years            | 810   | 565 (69.8)  | 188 (23.2)  | 24 (3.0)    | 33 (4.1)   | 0.97 (0.77-1.24) | 1.75 (0.86-3.55) | 1.44 (0.82-2.53) | 0.96 (0.76-1.23) | 1.69 (0.83-3.44) | 1.40 (0.79-2.46) |
| 13 years            | 832   | 592 (71.2)  | 183 (22.0)  | 30 (3.6)    | 27 (3.3)   | 0.92 (0.72-1.17) | 2.13 (1.07-4.21) | 1.15 (0.64-2.06) | 0.91 (0.72-1.16) | 2.08 (1.05-4.12) | 1.12 (0.62-2.02) |
| ≥14 years           | 700   | 492 (70.3)  | 175 (25.0)  | 12 (1.7)    | 21 (3.0)   | Ref              | Ref              | Ref              | Ref              | Ref              | Ref              |
| Per 1-year decrease |       |             |             |             |            | 1.00 (0.95-1.05) | 1.10 (0.96-1.26) | 1.09 (0.97-1.22) | 0.99 (0.94-1.04) | 1.08 (0.95-1.24) | 1.07 (0.95-1.20) |
| <b>Severity</b>     |       |             |             |             |            |                  |                  |                  |                  |                  |                  |
| <b>NSHD</b>         | 1041  | 725 (69.6)  | 41 (3.9)    | 212 (20.4)  | 63 (6.1)   |                  |                  |                  |                  |                  |                  |
| ≤11 years           | 177   | 119 (67.2)  | 9 (5.1)     | 37 (20.9)   | 12 (6.8)   | 2.41 (0.79-7.36) | 1.37 (0.82-2.30) | 1.60 (0.67-3.84) | 2.73 (0.88-8.50) | 1.42 (0.84-2.39) | 1.59 (0.66-3.86) |
| 12 years            | 296   | 194 (65.5)  | 8 (2.7)     | 74 (25.0)   | 20 (6.8)   | 1.31 (0.42-4.09) | 1.69 (1.07-2.64) | 1.64 (0.75-3.60) | 1.41 (0.45-4.42) | 1.72 (1.09-2.70) | 1.64 (0.74-3.62) |
| 13 years            | 358   | 253 (70.7)  | 19 (5.3)    | 65 (18.2)   | 21 (5.9)   | 2.39 (0.87-6.52) | 1.14 (0.72-1.79) | 1.32 (0.61-2.88) | 2.48 (0.90-6.81) | 1.16 (0.73-1.82) | 1.33 (0.61-2.91) |
| ≥14 years           | 210   | 159 (75.7)  | 5 (2.4)     | 36 (17.1)   | 10 (4.8)   | Ref              | Ref              | Ref              | Ref              | Ref              | Ref              |
| Per 1-year decrease |       |             |             |             |            | 1.14 (0.87-1.51) | 1.13 (0.99-1.29) | 1.16 (0.92-1.45) | 1.18 (0.89-1.57) | 1.14 (0.99-1.30) | 1.15 (0.91-1.45) |
| <b>NCDS</b>         | 3261  | 1580 (48.5) | 212 (6.5)   | 1023 (31.4) | 446 (13.7) |                  |                  |                  |                  |                  |                  |
| ≤11 years           | 532   | 258 (48.5)  | 29 (5.5)    | 175 (32.9)  | 70 (13.2)  | 0.83 (0.52-1.32) | 1.10 (0.86-1.40) | 1.12 (0.79-1.57) | 0.86 (0.53-1.38) | 1.13 (0.88-1.45) | 1.13 (0.80-1.59) |
| 12 years            | 808   | 385 (47.7)  | 58 (7.2)    | 239 (29.6)  | 126 (15.6) | 1.10 (0.74-1.62) | 1.00 (0.80-1.25) | 1.35 (1.01-1.82) | 1.11 (0.75-1.64) | 1.02 (0.81-1.27) | 1.36 (1.01-1.83) |
| 13 years            | 1080  | 517 (47.9)  | 67 (6.2)    | 348 (32.2)  | 148 (13.7) | 0.95 (0.65-1.38) | 1.09 (0.88-1.33) | 1.17 (0.88-1.56) | 0.95 (0.65-1.39) | 1.10 (0.89-1.35) | 1.18 (0.89-1.56) |
| ≥14 years           | 841   | 420 (49.9)  | 58 (6.9)    | 261 (31.0)  | 102 (12.1) | Ref              | Ref              | Ref              | Ref              | Ref              | Ref              |
| Per 1-year decrease |       |             |             |             |            | 0.95 (0.84-1.08) | 1.02 (0.96-1.09) | 1.07 (0.98-1.17) | 0.96 (0.85-1.09) | 1.03 (0.96-1.10) | 1.07 (0.98-1.17) |
| <b>HOW</b>          | 462   | 291 (63.0)  | 118 (25.5)  | 36 (7.8)    | 17 (3.7)   |                  |                  |                  |                  |                  |                  |
| ≤11 years           | 91    | 61 (67.0)   | 17 (18.7)   | 6 (6.6)     | 7 (7.7)    | N/A              | N/A              | N/A              | N/A              | N/A              | N/A              |
| 12 years            | 74    | 40 (54.1)   | 27 (36.5)   | 6 (8.1)     | 1 (1.4)    |                  |                  |                  |                  |                  |                  |
| 13 years            | 128   | 86 (67.2)   | 29 (22.7)   | 9 (7.0)     | 4 (3.1)    |                  |                  |                  |                  |                  |                  |
| ≥14 years           | 169   | 104 (61.5)  | 45 (26.6)   | 15 (8.9)    | 5 (3.0)    |                  |                  |                  |                  |                  |                  |
| Per 1-year decrease |       |             |             |             |            |                  |                  |                  |                  |                  |                  |
| <b>SMWHS</b>        | 189   | 147 (77.8)  | 26 (13.8)   | 5 (2.6)     | 11 (5.8)   |                  |                  |                  |                  |                  |                  |
| ≤11 years           | 32    | 26 (81.3)   | 3 (9.4)     | 0 (0.0)     | 3 (9.4)    | N/A              | N/A              | N/A              | N/A              | N/A              | N/A              |
| 12 years            | 60    | 43 (71.7)   | 9 (15.0)    | 1 (1.7)     | 7 (11.7)   |                  |                  |                  |                  |                  |                  |
| 13 years            | 60    | 49 (81.7)   | 9 (15.0)    | 1 (1.7)     | 1 (1.7)    |                  |                  |                  |                  |                  |                  |
| ≥14 years           | 37    | 29 (78.4)   | 5 (13.5)    | 3 (8.1)     | 0 (0.0)    |                  |                  |                  |                  |                  |                  |
| Per 1-year decrease |       |             |             |             |            |                  |                  |                  |                  |                  |                  |

Data are presented as n (%) or relative risk ratio (RRR) and 95% confidence intervals (95% CI) using multinomial logistic regression models with a generalised logit link.

N/A indicated that the HOW and SMWHS studies did not have sufficient data to perform regression models.

<sup>a</sup> Model 1 was adjusted for birth year and race/ethnicity/region.

<sup>b</sup> Model 2 was additionally adjusted for body mass index.

**Table S3.** Association between age at menarche and risk of hot flushes and night sweats adjusted for other factors

| Hot flushes                                 |       | Hot flushes<br>Model 3: RRR (95% CI) <sup>a</sup>  |                  |                        |                  | Hot flushes<br>Model 4: RRR (95% CI) <sup>b</sup>  |                  |                        |                  |
|---------------------------------------------|-------|----------------------------------------------------|------------------|------------------------|------------------|----------------------------------------------------|------------------|------------------------|------------------|
| Age at menarche                             | n     | Never                                              | Rarely<br>/Mild  | Sometimes<br>/Moderate | Often<br>/Severe | Never                                              | Rarely<br>/Mild  | Sometimes<br>/Moderate | Often<br>/Severe |
| <b>Frequency (ALSWH + SWAN)</b>             |       |                                                    |                  |                        |                  |                                                    |                  |                        |                  |
|                                             | 13602 |                                                    |                  |                        |                  |                                                    |                  |                        |                  |
| ≤11 years                                   | 2713  | Ref                                                | 1.18 (1.14-1.22) | 1.13 (1.06-1.21)       | 1.42 (1.40-1.43) | Ref                                                | 1.10 (1.06-1.14) | 1.01 (0.94-1.08)       | 1.25 (1.25-1.26) |
| 12 years                                    | 3084  | Ref                                                | 0.98 (0.96-1.00) | 0.95 (0.88-1.01)       | 1.25 (1.18-1.33) | Ref                                                | 0.95 (0.93-0.97) | 0.89 (0.83-0.96)       | 1.18 (1.10-1.26) |
| 13 years                                    | 3776  | Ref                                                | 1.04 (0.93-1.15) | 1.03 (0.97-1.09)       | 1.17 (1.12-1.23) | Ref                                                | 1.02 (0.92-1.13) | 1.00 (0.94-1.06)       | 1.14 (1.10-1.18) |
| ≥14 years                                   | 4029  | Ref                                                | Ref              | Ref                    | Ref              | Ref                                                | Ref              | Ref                    | Ref              |
| Per 1-year decrease                         |       | Ref                                                | 1.03 (1.02-1.04) | 1.02 (1.01-1.04)       | 1.09 (1.08-1.09) | Ref                                                | 1.01 (1.00-1.03) | 1.00 (0.98-1.02)       | 1.06 (1.05-1.07) |
| <b>Severity (NSHD + NCDS + HOW + SMWHS)</b> |       |                                                    |                  |                        |                  |                                                    |                  |                        |                  |
|                                             | 4953  |                                                    |                  |                        |                  |                                                    |                  |                        |                  |
| ≤11 years                                   | 832   | Ref                                                | 1.16 (0.86-1.55) | 1.14 (0.90-1.44)       | 1.04 (0.81-1.34) | Ref                                                | 1.15 (0.88-1.51) | 1.10 (0.87-1.38)       | 0.97 (0.75-1.26) |
| 12 years                                    | 1238  | Ref                                                | 1.13 (0.80-1.60) | 1.04 (0.91-1.19)       | 1.22 (1.17-1.26) | Ref                                                | 1.13 (0.78-1.64) | 1.02 (0.88-1.18)       | 1.17 (1.12-1.22) |
| 13 years                                    | 1626  | Ref                                                | 1.06 (0.84-1.35) | 1.09 (0.99-1.19)       | 1.24 (1.16-1.34) | Ref                                                | 1.06 (0.82-1.37) | 1.07 (0.97-1.18)       | 1.21 (1.13-1.31) |
| ≥14 years                                   | 1257  | Ref                                                | Ref              | Ref                    | Ref              | Ref                                                | Ref              | Ref                    | Ref              |
| Per 1-year decrease                         |       | Ref                                                | 1.03 (1.00-1.07) | 1.03 (0.98-1.08)       | 1.02 (0.98-1.06) | Ref                                                | 1.03 (1.00-1.06) | 1.02 (0.97-1.08)       | 1.00 (0.96-1.05) |
| Night sweats                                |       | Night sweats<br>Model 3: RRR (95% CI) <sup>a</sup> |                  |                        |                  | Night sweats<br>Model 4: RRR (95% CI) <sup>b</sup> |                  |                        |                  |
| Age at menarche                             | n     | Never                                              | Rarely<br>/Mild  | Sometimes<br>/Moderate | Often<br>/Severe | Never                                              | Rarely<br>/Mild  | Sometimes<br>/Moderate | Often<br>/Severe |
| <b>Frequency (ALSWH + SWAN)</b>             |       |                                                    |                  |                        |                  |                                                    |                  |                        |                  |
|                                             | 13602 |                                                    |                  |                        |                  |                                                    |                  |                        |                  |
| ≤11 years                                   | 2713  | Ref                                                | 1.04 (0.88-1.23) | 1.06 (1.02-1.11)       | 1.50 (1.42-1.58) | Ref                                                | 1.02 (0.86-1.20) | 1.00 (0.96-1.04)       | 1.40 (1.34-1.46) |
| 12 years                                    | 3084  | Ref                                                | 0.97 (0.96-0.99) | 1.02 (0.97-1.08)       | 1.23 (1.16-1.32) | Ref                                                | 0.97 (0.95-0.98) | 0.99 (0.94-1.05)       | 1.19 (1.11-1.29) |
| 13 years                                    | 3776  | Ref                                                | 1.04 (0.98-1.11) | 0.95 (0.87-1.05)       | 1.22 (1.19-1.24) | Ref                                                | 1.03 (0.97-1.10) | 0.94 (0.85-1.03)       | 1.20 (1.17-1.22) |
| ≥14 years                                   | 4029  | Ref                                                | Ref              | Ref                    | Ref              | Ref                                                | Ref              | Ref                    | Ref              |
| Per 1-year decrease                         |       | Ref                                                | 1.01 (0.99-1.04) | 1.02 (1.01-1.02)       | 1.10 (1.09-1.11) | Ref                                                | 1.01 (0.99-1.03) | 1.00 (0.99-1.01)       | 1.08 (1.07-1.09) |
| <b>Severity (NSHD + NCDS + HOW + SMWHS)</b> |       |                                                    |                  |                        |                  |                                                    |                  |                        |                  |
|                                             | 4953  |                                                    |                  |                        |                  |                                                    |                  |                        |                  |
| ≤11 years                                   | 832   | Ref                                                | 0.84 (0.65-1.09) | 1.06 (0.99-1.14)       | 1.18 (0.90-1.55) | Ref                                                | 0.86 (0.66-1.13) | 1.10 (1.03-1.17)       | 1.19 (0.92-1.54) |
| 12 years                                    | 1238  | Ref                                                | 1.21 (0.99-1.48) | 1.10 (0.90-1.34)       | 1.45 (1.29-1.64) | Ref                                                | 1.23 (1.02-1.48) | 1.11 (0.92-1.34)       | 1.44 (1.29-1.61) |
| 13 years                                    | 1626  | Ref                                                | 0.99 (0.81-1.22) | 1.08 (1.03-1.13)       | 1.24 (1.23-1.26) | Ref                                                | 1.00 (0.81-1.23) | 1.08 (1.02-1.15)       | 1.23 (1.20-1.27) |
| ≥14 years                                   | 1257  | Ref                                                | Ref              | Ref                    | Ref              | Ref                                                | Ref              | Ref                    | Ref              |
| Per 1-year decrease                         |       | Ref                                                | 0.98 (0.94-1.02) | 1.02 (0.99-1.06)       | 1.08 (1.01-1.15) | Ref                                                | 0.99 (0.94-1.03) | 1.03 (1.00-1.07)       | 1.08 (1.02-1.15) |

Data are presented as n (%) or relative risk ratio (RRR) and 95% confidence intervals (95% CI) using generalised linear mix models with multinomial distribution and generalised logit link. The Glimmix procedure in SAS was used to incorporate study as a random effect into the analyses.

<sup>a</sup> Model 3 was adjusted for birth year, race/ethnicity/region, education level, smoking status, menopausal status, use of menopausal hormone therapy, and diabetes status.

<sup>b</sup> Model 4 was adjusted for covariates in model 3 plus body mass index.

**Table S4.** Association between age at menarche and risk of hot flushes and night sweats stratified by menopausal status

| Age at menarche                  | Frequency of hot flushes<br>Model 1: RRR (95% CI) <sup>a</sup>  |       |                  |                  |                  | Severity of hot flushes<br>Model 1: RRR (95% CI) <sup>a</sup>  |       |                  |                  |                  |
|----------------------------------|-----------------------------------------------------------------|-------|------------------|------------------|------------------|----------------------------------------------------------------|-------|------------------|------------------|------------------|
|                                  | n                                                               | Never | Rarely           | Sometimes        | Often            | n                                                              | Never | Mild             | Moderate         | Severe           |
| <b>Hysterectomy/oophorectomy</b> | 2378                                                            |       |                  |                  |                  | 843                                                            |       |                  |                  |                  |
| ≤11 years                        | 532                                                             | Ref   | 1.18 (0.85-1.64) | 1.04 (0.78-1.38) | 1.56 (1.10-2.20) | 170                                                            | Ref   | 0.65 (0.43-0.97) | 1.14 (0.68-1.90) | 0.81 (0.44-1.50) |
| 12 years                         | 538                                                             | Ref   | 1.17 (0.85-1.62) | 0.94 (0.71-1.25) | 1.37 (0.97-1.94) | 228                                                            | Ref   | 0.88 (0.61-1.26) | 0.79 (0.56-1.11) | 1.09 (0.83-1.43) |
| 13 years                         | 618                                                             | Ref   | 0.92 (0.67-1.26) | 0.96 (0.74-1.25) | 1.11 (0.79-1.56) | 257                                                            | Ref   | 0.99 (0.69-1.40) | 1.08 (0.49-2.40) | 1.26 (1.04-1.53) |
| ≥14 years                        | 690                                                             | Ref   | Ref              | Ref              | Ref              | 188                                                            | Ref   | Ref              | Ref              | Ref              |
| Per 1-year decrease              |                                                                 | Ref   | 1.03 (0.96-1.11) | 1.01 (0.95-1.08) | 1.13 (1.05-1.22) |                                                                | Ref   | 0.91 (0.86-0.96) | 1.02 (0.89-1.17) | 0.97 (0.83-1.12) |
| <b>Postmenopause</b>             | 524                                                             |       |                  |                  |                  | 1000                                                           |       |                  |                  |                  |
| ≤11 years                        | 89                                                              | Ref   | 1.57 (0.71-3.46) | 1.12 (0.55-2.30) | 2.22 (1.03-4.78) | 178                                                            | Ref   | 1.18 (0.82-1.71) | 0.95 (0.75-1.20) | 0.87 (0.70-1.09) |
| 12 years                         | 115                                                             | Ref   | 0.83 (0.38-1.82) | 1.33 (0.71-2.47) | 1.81 (0.89-3.68) | 236                                                            | Ref   | 1.51 (0.57-4.02) | 1.32 (1.01-1.71) | 1.13 (0.85-1.49) |
| 13 years                         | 143                                                             | Ref   | 0.76 (0.37-1.57) | 1.01 (0.56-1.80) | 1.77 (0.92-3.38) | 317                                                            | Ref   | 1.12 (0.71-1.77) | 1.01 (0.90-1.14) | 0.98 (0.82-1.17) |
| ≥14 years                        | 177                                                             | Ref   | Ref              | Ref              | Ref              | 269                                                            | Ref   | Ref              | Ref              | Ref              |
| Per 1-year decrease              |                                                                 | Ref   | 0.98 (0.82-1.17) | 1.05 (0.91-1.22) | 1.19 (1.01-1.40) |                                                                | Ref   | 1.04 (0.94-1.15) | 1.01 (0.91-1.11) | 0.98 (0.92-1.03) |
| <b>Pre/perimenopause</b>         | 9127                                                            |       |                  |                  |                  | 2450                                                           |       |                  |                  |                  |
| ≤11 years                        | 1807                                                            | Ref   | 1.20 (1.18-1.22) | 1.21 (1.11-1.32) | 1.30 (1.27-1.33) | 386                                                            | Ref   | 1.40 (1.01-1.93) | 1.31 (1.10-1.55) | 1.58 (1.42-1.76) |
| 12 years                         | 2094                                                            | Ref   | 0.92 (0.82-1.02) | 0.94 (0.83-1.08) | 1.19 (1.05-1.34) | 586                                                            | Ref   | 1.05 (0.89-1.25) | 0.96 (0.79-1.18) | 1.44 (1.12-1.86) |
| 13 years                         | 2587                                                            | Ref   | 1.03 (0.93-1.14) | 1.01 (0.94-1.08) | 0.98 (0.91-1.06) | 861                                                            | Ref   | 1.04 (0.78-1.38) | 1.07 (0.98-1.16) | 1.52 (1.29-1.80) |
| ≥14 years                        | 2639                                                            | Ref   | Ref              | Ref              | Ref              | 617                                                            | Ref   | Ref              | Ref              | Ref              |
| Per 1-year decrease              |                                                                 | Ref   | 1.04 (1.02-1.05) | 1.04 (1.01-1.07) | 1.07 (1.05-1.09) |                                                                | Ref   | 1.09 (1.02-1.17) | 1.06 (1.04-1.09) | 1.15 (1.09-1.20) |
|                                  |                                                                 |       |                  |                  |                  |                                                                |       |                  |                  |                  |
|                                  |                                                                 |       |                  |                  |                  |                                                                |       |                  |                  |                  |
|                                  | Frequency of night sweats<br>Model 1: RRR (95% CI) <sup>a</sup> |       |                  |                  |                  | Severity of night sweats<br>Model 1: RRR (95% CI) <sup>a</sup> |       |                  |                  |                  |
|                                  | n                                                               | Never | Rarely           | Sometimes        | Often            | n                                                              | Never | Mild             | Moderate         | Severe           |
| <b>Hysterectomy/oophorectomy</b> | 2378                                                            |       |                  |                  |                  | 843                                                            |       |                  |                  |                  |
| ≤11 years                        | 532                                                             | Ref   | 1.25 (0.90-1.74) | 1.28 (0.95-1.71) | 1.70 (1.16-2.50) | 170                                                            | Ref   | 0.76 (0.71-0.81) | 1.57 (0.99-2.49) | 1.20 (0.62-2.31) |
| 12 years                         | 538                                                             | Ref   | 1.05 (0.76-1.46) | 1.07 (0.80-1.43) | 1.26 (0.85-1.87) | 228                                                            | Ref   | 0.99 (0.62-1.58) | 1.46 (0.86-2.49) | 1.47 (0.96-2.23) |
| 13 years                         | 618                                                             | Ref   | 1.03 (0.75-1.42) | 0.87 (0.65-1.16) | 1.32 (0.91-1.92) | 257                                                            | Ref   | 0.50 (0.27-0.95) | 1.56 (1.25-1.94) | 1.43 (1.08-1.89) |
| ≥14 years                        | 690                                                             | Ref   | Ref              | Ref              | Ref              | 188                                                            | Ref   | Ref              | Ref              | Ref              |
| Per 1-year decrease              |                                                                 | Ref   | 1.08 (1.00-1.16) | 1.07 (1.01-1.15) | 1.14 (1.05-1.24) |                                                                | Ref   | 0.98 (0.94-1.03) | 1.11 (0.98-1.25) | 1.05 (0.90-1.23) |
| <b>Postmenopause</b>             | 524                                                             |       |                  |                  |                  | 1000                                                           |       |                  |                  |                  |
| ≤11 years                        | 89                                                              | Ref   | 1.72 (0.84-3.56) | 1.15 (0.58-2.29) | 2.70 (1.26-5.79) | 178                                                            | Ref   | 0.84 (0.34-2.08) | 0.91 (0.78-1.06) | 1.00 (0.81-1.23) |
| 12 years                         | 115                                                             | Ref   | 1.30 (0.65-2.58) | 1.58 (0.87-2.85) | 1.98 (0.94-4.18) | 236                                                            | Ref   | 1.25 (0.78-2.02) | 0.92 (0.71-1.20) | 1.22 (0.80-1.87) |
| 13 years                         | 143                                                             | Ref   | 0.94 (0.49-1.78) | 0.94 (0.54-1.65) | 1.12 (0.54-2.32) | 317                                                            | Ref   | 0.77 (0.53-1.10) | 0.89 (0.71-1.11) | 1.05 (0.87-1.27) |
| ≥14 years                        | 177                                                             | Ref   | Ref              | Ref              | Ref              | 269                                                            | Ref   | Ref              | Ref              | Ref              |
| Per 1-year decrease              |                                                                 | Ref   | 1.15 (0.98-1.35) | 1.08 (0.94-1.24) | 1.29 (1.08-1.54) |                                                                | Ref   | 0.96 (0.79-1.16) | 0.99 (0.93-1.04) | 1.00 (0.95-1.06) |
| <b>Pre/perimenopause</b>         | 9127                                                            |       |                  |                  |                  | 2450                                                           |       |                  |                  |                  |
| ≤11 years                        | 1807                                                            | Ref   | 0.97 (0.83-1.13) | 1.07 (1.04-1.09) | 1.45 (1.39-1.53) | 386                                                            | Ref   | 0.89 (0.42-1.87) | 1.07 (0.97-1.17) | 1.21 (0.84-1.72) |
| 12 years                         | 2094                                                            | Ref   | 0.96 (0.94-0.99) | 1.00 (0.88-1.13) | 1.17 (1.00-1.38) | 586                                                            | Ref   | 1.20 (0.97-1.50) | 1.11 (0.89-1.39) | 1.52 (0.98-2.34) |
| 13 years                         | 2587                                                            | Ref   | 1.03 (0.90-1.17) | 1.02 (0.88-1.18) | 1.07 (1.03-1.11) | 861                                                            | Ref   | 1.25 (0.89-1.76) | 1.00 (0.95-1.05) | 1.19 (1.01-1.41) |
| ≥14 years                        | 2639                                                            | Ref   | Ref              | Ref              | Ref              | 617                                                            | Ref   | Ref              | Ref              | Ref              |
| Per 1-year decrease              |                                                                 | Ref   | 1.00 (0.99-1.01) | 1.01 (0.99-1.04) | 1.09 (1.09-1.09) |                                                                | Ref   | 0.97 (0.84-1.12) | 1.03 (0.98-1.08) | 1.12 (0.98-1.28) |

Data are presented as n (%) or relative risk ratio (RRR) and 95% confidence intervals (95% CI) using generalised linear mix models with multinomial distribution and generalised logit link. The Glimmix procedure in SAS was used to incorporate study as a random effect into the analyses. Frequency data were collected from ALSWH and SWAN, while severity data were collected from NSHD, NCDS, HOW, and SMWHS. SWAN data were not included in the analyses for hysterectomy/oophorectomy and postmenopause as all women were pre- or perimenopausal at baseline. <sup>a</sup> Model 1 was adjusted for birth year and race/ethnicity/region.

**Table S5.** Association between age at menarche and risk of hot flushes and night sweats only among women with VMS, using rarely or mild symptoms as the reference

| Age at menarche                             | n    | Hot flushes<br>Model 1: RRR (95% CI) <sup>a</sup> |                 |                        |                  | n    | Night sweats<br>Model 1: RRR (95% CI) <sup>a</sup> |                 |                        |                  |
|---------------------------------------------|------|---------------------------------------------------|-----------------|------------------------|------------------|------|----------------------------------------------------|-----------------|------------------------|------------------|
|                                             |      | Never                                             | Rarely<br>/Mild | Sometimes<br>/Moderate | Often<br>/Severe |      | Never                                              | Rarely<br>/Mild | Sometimes<br>/Moderate | Often<br>/Severe |
| <b>Frequency (ALSWH + SWAN)</b>             | 5909 |                                                   |                 |                        | 4978             |      |                                                    |                 |                        |                  |
| ≤11 years                                   | 1258 | N/A                                               | Ref             | 0.97 (0.93-1.02)       | 1.25 (1.20-1.29) | 1054 | N/A                                                | Ref             | 1.00 (0.94-1.07)       | 1.48 (1.39-1.59) |
| 12 years                                    | 1289 | N/A                                               | Ref             | 0.98 (0.91-1.06)       | 1.30 (1.25-1.35) | 1113 | N/A                                                | Ref             | 1.08 (0.99-1.17)       | 1.32 (1.24-1.41) |
| 13 years                                    | 1610 | N/A                                               | Ref             | 1.00 (1.00-1.00)       | 1.11 (1.06-1.17) | 1350 | N/A                                                | Ref             | 0.91 (0.76-1.08)       | 1.14 (1.05-1.24) |
| ≥14 years                                   | 1752 | N/A                                               | Ref             | Ref                    | Ref              | 1461 | N/A                                                | Ref             | Ref                    | Ref              |
| Per 1-year decrease                         |      | N/A                                               | Ref             | 1.00 (0.99-1.01)       | 1.07 (1.06-1.07) |      | N/A                                                | Ref             | 1.00 (0.98-1.02)       | 1.09 (1.08-1.10) |
| <b>Severity (NSHD + NCDS + HOW + SMWHS)</b> | 2771 |                                                   |                 |                        | 2210             |      |                                                    |                 |                        |                  |
| ≤11 years                                   | 477  | N/A                                               | Ref             | 1.01 (0.74-1.36)       | 1.00 (0.73-1.37) | 368  | N/A                                                | Ref             | 1.22 (0.98-1.51)       | 1.43 (1.12-1.82) |
| 12 years                                    | 696  | N/A                                               | Ref             | 1.00 (0.87-1.16)       | 1.19 (1.02-1.40) | 576  | N/A                                                | Ref             | 0.95 (0.79-1.14)       | 1.27 (1.09-1.49) |
| 13 years                                    | 911  | N/A                                               | Ref             | 1.02 (0.80-1.31)       | 1.15 (0.99-1.34) | 721  | N/A                                                | Ref             | 0.98 (0.74-1.30)       | 1.12 (0.91-1.38) |
| ≥14 years                                   | 687  | N/A                                               | Ref             | Ref                    | Ref              | 545  | N/A                                                | Ref             | Ref                    | Ref              |
| Per 1-year decrease                         |      | N/A                                               | Ref             | 1.02 (0.94-1.10)       | 1.03 (0.97-1.09) |      | N/A                                                | Ref             | 1.05 (1.02-1.08)       | 1.12 (1.09-1.15) |

Data are presented as relative risk ratio (RRR) and 95% confidence intervals (95% CI) using generalised linear mix models with multinomial distribution and generalised logit link. The Glimmix procedure in SAS was used to incorporate study as a random effect into the analyses. N/A indicated that women with no symptoms were excluded from the analyses.

<sup>a</sup> Model 1 was adjusted for birth year and race/ethnicity/region.

**Table S6.** Distribution of frequency and severity of hot flushes and night sweats

|                                             | Frequency of night sweats |           |            |           | Kendall's Tau-b (95% CI) |
|---------------------------------------------|---------------------------|-----------|------------|-----------|--------------------------|
|                                             | Never                     | Rarely    | Sometimes  | Often     |                          |
| <b>Frequency of hot flushes</b>             |                           |           |            |           |                          |
| <b>(ALSWH + SWAN) (n=13602)</b>             |                           |           |            |           |                          |
| Never                                       | 6769 (49.8)               | 650 (4.8) | 214 (1.6)  | 60 (0.4)  | 0.61 (0.60-0.62)         |
| Rarely                                      | 1067 (7.8)                | 999 (7.3) | 160 (1.2)  | 47 (0.4)  |                          |
| Sometimes                                   | 644 (4.7)                 | 487 (3.6) | 1213 (8.9) | 89 (0.7)  |                          |
| Often                                       | 144 (1.1)                 | 95 (0.7)  | 243(1.8)   | 721 (5.3) |                          |
|                                             | Severity of night sweats  |           |            |           |                          |
|                                             | Never                     | Mild      | Moderate   | Severe    |                          |
| <b>Severity of hot flushes</b>              |                           |           |            |           |                          |
| <b>(NSHD + NCDS + HOW + SMWHS) (n=4953)</b> |                           |           |            |           |                          |
| Never                                       | 1877 (37.9)               | 102 (2.1) | 182 (3.7)  | 21 (0.4)  | 0.59 (0.57-0.61)         |
| Mild                                        | 256 (5.2)                 | 174 (3.5) | 66 (1.3)   | 7 (0.1)   |                          |
| Moderate                                    | 523 (10.6)                | 109 (2.2) | 797 (16.1) | 105 (2.1) |                          |
| Severe                                      | 87 (1.8)                  | 12 (0.2)  | 231 (4.7)  | 404 (8.2) |                          |

Data were presented as n (%).

**Table S7.** Association between age at menarche and risk of hot flushes alone, night sweats alone, and both symptoms

| Age at menarche                             | Hot flushes alone vs no symptoms <sup>a</sup><br>Model 1: RRR (95% CI) <sup>d</sup> |                        |                  | Night sweats alone vs no symptoms <sup>b</sup><br>Model 1: RRR (95% CI) <sup>d</sup> |                        |                  | Both symptoms vs no symptoms <sup>c</sup><br>Model 1: RRR (95% CI) <sup>d</sup> |                        |                  |
|---------------------------------------------|-------------------------------------------------------------------------------------|------------------------|------------------|--------------------------------------------------------------------------------------|------------------------|------------------|---------------------------------------------------------------------------------|------------------------|------------------|
|                                             | Rarely<br>/Mild                                                                     | Sometimes<br>/Moderate | Often<br>/Severe | Rarely<br>/Mild                                                                      | Sometimes<br>/Moderate | Often<br>/Severe | Rarely<br>/Mild                                                                 | Sometimes<br>/Moderate | Often<br>/Severe |
| <b>Frequency (ALSWH + SWAN)</b>             |                                                                                     |                        |                  |                                                                                      |                        |                  |                                                                                 |                        |                  |
| ≤11 years                                   | 1.22 (1.18-1.26)                                                                    | 1.06 (0.96-1.17)       | 1.28 (1.23-1.33) | 1.06 (0.85-1.33)                                                                     | 0.92 (0.91-0.93)       | 1.31 (0.82-2.11) | 1.23 (1.00-1.51)                                                                | 1.20 (1.14-1.27)       | 1.71 (1.48-1.96) |
| 12 years                                    | 0.99 (0.98-0.99)                                                                    | 0.94 (0.85-1.03)       | 1.38 (1.35-1.41) | 1.01 (0.98-1.04)                                                                     | 1.12 (0.99-1.26)       | 1.26 (0.96-1.66) | 0.99 (0.97-1.01)                                                                | 0.95 (0.95-0.96)       | 1.26 (1.24-1.27) |
| 13 years                                    | 1.03 (0.96-1.11)                                                                    | 1.05 (1.03-1.07)       | 1.13 (1.02-1.26) | 1.08 (0.95-1.23)                                                                     | 0.97 (0.77-1.22)       | 1.17 (1.09-1.24) | 1.15 (1.12-1.18)                                                                | 0.92 (0.88-0.95)       | 1.17 (1.16-1.18) |
| ≥14 years                                   | Ref                                                                                 | Ref                    | Ref              | Ref                                                                                  | Ref                    | Ref              | Ref                                                                             | Ref                    | Ref              |
| Per 1-year decrease                         | 1.04 (1.04-1.04)                                                                    | 1.01 (0.99-1.04)       | 1.08 (1.07-1.09) | 1.02 (0.99-1.05)                                                                     | 0.99 (0.96-1.01)       | 1.07 (1.02-1.12) | 1.05 (1.02-1.08)                                                                | 1.03 (1.03-1.04)       | 1.13 (1.11-1.15) |
| <b>Severity (NSHD + NCDS + HOW + SMWHS)</b> |                                                                                     |                        |                  |                                                                                      |                        |                  |                                                                                 |                        |                  |
| ≤11 years                                   | 1.09 (0.83-1.42)                                                                    | 1.03 (0.85-1.24)       | 1.11 (0.83-1.49) | 0.86 (0.64-1.15)                                                                     | 0.96 (0.58-1.58)       | 1.87 (0.90-3.89) | 0.93 (0.57-1.50)                                                                | 1.26 (0.98-1.63)       | 1.28 (0.92-1.78) |
| 12 years                                    | 1.06 (0.69-1.63)                                                                    | 0.93 (0.62-1.38)       | 0.96 (0.69-1.35) | 1.09 (0.77-1.54)                                                                     | 1.06 (0.91-1.22)       | 1.77 (0.68-4.62) | 1.04 (0.49-2.23)                                                                | 1.21 (0.94-1.54)       | 1.67 (1.50-1.86) |
| 13 years                                    | 1.03 (0.79-1.35)                                                                    | 1.04 (0.87-1.25)       | 1.09 (0.82-1.45) | 1.01 (0.83-1.23)                                                                     | 1.02 (0.70-1.49)       | 1.22 (0.49-3.02) | 0.93 (0.61-1.41)                                                                | 1.16 (1.15-1.16)       | 1.38 (1.35-1.40) |
| ≥14 years                                   | Ref                                                                                 | Ref                    | Ref              | Ref                                                                                  | Ref                    | Ref              | Ref                                                                             | Ref                    | Ref              |
| Per 1-year decrease                         | 1.01 (0.99-1.03)                                                                    | 0.99 (0.97-1.01)       | 1.04 (1.03-1.05) | 0.97 (0.92-1.02)                                                                     | 0.99 (0.92-1.07)       | 1.20 (1.00-1.45) | 0.97 (0.90-1.06)                                                                | 1.08 (0.99-1.17)       | 1.10 (1.04-1.16) |

Data are presented as n (%) or relative risk ratio (RRR) and 95% confidence intervals (95% CI) using generalised linear mix models with multinomial distribution and generalised logit link. The Glimmix procedure in SAS was used to incorporate study as a random effect into the analyses. The risks for the combination of often hot flushes but sometimes/moderate night sweats and the combination of often night sweats but sometimes/moderate hot flushes associated with age at menarche were not presented.

<sup>a</sup> 'Hot flushes alone' model was conducted among women who experienced any hot flushes but never or rarely/mild night sweats.

<sup>b</sup> 'Night sweats alone' model was conducted among women who experienced any night sweats but never or rarely/mild hot flushes.

<sup>c</sup> 'Both symptoms' model was conducted among women who experienced same degree of both symptoms (i.e., reporting both often/severe hot flushes and often/severe night sweats, or both sometimes/moderate hot flushes and sometimes/moderate night sweats).

<sup>d</sup> RRRs (95%CI) were adjusted for birth year and race/ethnicity/region.
